# Supplementary material for: Association of Metabolic Signatures with Nonalcoholic Fatty Liver Disease in Pediatric Population
Source: MDPI journal article supplement (doi:10.3390/metabo12090881), 2022-09-19

# Association of Metabolic Signatures with Nonalcoholic Fatty Liver Disease in Pediatric Population

Woori Chae <sup>1,2,†</sup>, Kyung Jae Lee <sup>3,†,‡</sup>, Ki Young Huh <sup>1</sup>, Jin Soo Moon <sup>4</sup>, Jae Sung Ko <sup>4,\*</sup>  
and Joo-Youn Cho <sup>1,2,\*</sup>

<sup>1</sup> Department of Clinical Pharmacology and Therapeutics, Seoul National University College of Medicine and Hospital, Seoul 03080, Korea

<sup>2</sup> Department of Biomedical Sciences, Seoul National University College of Medicine, Seoul 03080, Korea

<sup>3</sup> Department of Pediatrics, Hallym University Sacred Heart Hospital, Anyang 14068, Korea

<sup>4</sup> Department of Pediatrics, Seoul National University College of Medicine, Seoul 03080, Korea

\* Correspondence: [kojs@snu.ac.kr](mailto:kojs@snu.ac.kr) (J.S.K.); [joocho@snu.ac.kr](mailto:joocho@snu.ac.kr) (J.-Y.C.); Tel.: +82-2-2072-2197 (J.S.K.); Tel.: +82-2-740-8286 (J.-Y.C.)

† These authors equally contributed to this work.

‡ Current Address: Department of Pediatrics, Seoul National University Children's Hospital, Seoul 03080, Korea.

### **Supplementary Method S1: Genotyping of NAFLD-related genetic variants**

Genomic DNA was extracted from peripheral blood using a Gentra Puregene Blood Kit (Qiagen, Hilden, Germany) according to the manufacturer's instructions. Participants were genotyped for seven variants of six genes, including PNPLA3 rs738409, glucokinase regulator gene (GCKR) rs780094, apolipoprotein C3 (APOC3) rs2070666, SAMM50 rs2073080 and rs3761472, TM6SF2 rs58542926, and membrane-bound O-acyltransferase domain-containing 7 (MBOAT7) rs641738 by using the TaqMan allelic discrimination assay with an ABI 7900HT Real-Time PCR system (Applied Biosystems, Foster City, CA, USA). Predesigned assay primers and probes were obtained from Applied Biosystems.

## List of Supplemental Tables and Figures

Table S1. Significant differences in 18 NAFLD-specific metabolic features after BMI z-score adjustment.

Table S2. Enriched metabolite sets of significant metabolites in the overweight control and overweight NAFLD group based on SMPDB by metabolite set enrichment analysis. Abbreviations: NAFLD, nonalcoholic fatty liver disease; FDR, false discovery rate.

Table S3. Summary of the performance metrics from 100 repeated runs of the diagnostic model using four machine learning methods.

Table S4. Multiple logistic regression model using NAFLD-specific metabolic features and clinical and genetic variables.

Table S5. Variable importance of three diagnostic models using NAFLD-specific metabolic features.

Table S6. Genotype frequencies of seven genetic variants of the study population.

Figure S1. Differences in metabolic profiles of subgroups of the study population.

Figure S2. Clinical characteristics of the study population according to the occurrence of obesity and NAFLD. Abbreviations: NAFLD, nonalcoholic fatty liver disease; BMI, body mass index; AST, aspartate aminotransferase; ALT, alanine aminotransferase; GGT, gamma-glutamyltransferase; ALP, alkaline phosphatase; HbA1c, Hemoglobin A1c; and HOMA-IR, homeostatic model assessment for insulin resistance.

Figure S3. Pareto-scaled score plot of principal component analysis showing metabolomic distribution in the study population (HC, LN, OC, and ON).

Figure S4. Spearman correlations between NAFLD-specific metabolic features and insulin resistance with  $p < 0.05$ , except Tyr, Lys, Gly, LPC (18:2), and PC-O (30:0). Abbreviations: Glu, glutamic acid; TG, triglyceride; DG, diglyceride; xLeu, sum of leucine and isoleucine levels; PC, phosphatidylcholine; SM, sphingomyelin; Ile, isoleucine; Val, valine; AC, acylcarnitine; Tyr, tyrosine; Lys, lysine; Gly, glycine; LPC, lysophosphatidylcholine; and PC-O, ether-linked phosphatidylcholine.

**Table S1.** Significant differences in 18 NAFLD-specific metabolic features after BMI z-score adjustment.

| Metabolite  | Raw p-value * | FDR ** -adjusted p-value |
|-------------|---------------|--------------------------|
| AC (5:0)    | 0.12682       | 0.1268                   |
| Glu         | 0.10228       | 0.1083                   |
| Gly         | 0.00115       | 0.0036                   |
| Ile         | 0.00159       | 0.0036                   |
| Lys         | 0.01402       | 0.0168                   |
| Tyr         | 0.00157       | 0.0036                   |
| Val         | 0.00145       | 0.0036                   |
| xLeu        | 0.00058       | 0.0035                   |
| (34:1)      | 0.01595       | 0.0179                   |
| TG (50:1)   | 0.01134       | 0.0146                   |
| TG (52:7)   | 0.00119       | 0.0036                   |
| TG (54:3)   | 0.00810       | 0.0121                   |
| LPC (18:2)  | 0.00910       | 0.0126                   |
| PC (44:1)   | 0.00724       | 0.0118                   |
| PC (46:2)   | 0.00309       | 0.0056                   |
| PC-O (30:0) | 0.00057       | 0.0035                   |
| SM (36:0)   | 0.00007       | 0.0013                   |
| SM (38:3)   | 0.00179       | 0.0036                   |

\* Raw p-values were calculated from multiple linear regression analyses (metabolite ~ BMI z-score + Phenotype (OC or ON)).

\*\* False discovery rate (FDR) was controlled for using the Benjamini–Hochberg method.

**Table S2.** Enriched metabolite sets of significant metabolites in the overweight control and overweight NAFLD group based on SMPDB by metabolite set enrichment analysis. Abbreviations: NAFLD, nonalcoholic fatty liver disease; FDR, false discovery rate.

| Metabolite sets                             | Total <sup>†</sup> | Expected hits | Observed hits | Enrichment ratio | Raw p    | Holm p | FDR   |
|---------------------------------------------|--------------------|---------------|---------------|------------------|----------|--------|-------|
| Valine, Leucine, and Isoleucine Degradation | 60                 | 0.820         | 4             | 4.88             | 6.86E-03 | 0.672  | 0.672 |
| Alanine Metabolism                          | 17                 | 0.232         | 2             | 8.62             | 2.10E-02 | 1      | 0.841 |
| Glutathione Metabolism                      | 21                 | 0.287         | 2             | 6.97             | 3.14E-02 | 1      | 0.841 |
| Carnitine Synthesis                         | 22                 | 0.301         | 2             | 6.64             | 3.43E-02 | 1      | 0.841 |
| Phenylalanine and Tyrosine Metabolism       | 28                 | 0.383         | 2             | 5.22             | 5.36E-02 | 1      | 0.954 |
| Lysine Degradation                          | 30                 | 0.410         | 2             | 4.88             | 6.07E-02 | 1      | 0.954 |
| Ammonia Recycling                           | 32                 | 0.438         | 2             | 4.57             | 6.81E-02 | 1      | 0.954 |
| Biotin Metabolism                           | 8                  | 0.109         | 1             | 9.17             | 1.05E-01 | 1      | 1     |
| Propanoate Metabolism                       | 42                 | 0.574         | 2             | 3.48             | 1.09E-01 | 1      | 1     |
| Malate-Aspartate Shuttle                    | 10                 | 0.137         | 1             | 7.30             | 1.29E-01 | 1      | 1     |
| Glutamate Metabolism                        | 49                 | 0.670         | 2             | 2.99             | 1.42E-01 | 1      | 1     |
| Arginine and Proline Metabolism             | 53                 | 0.725         | 2             | 2.76             | 1.61E-01 | 1      | 1     |
| Glucose-Alanine Cycle                       | 13                 | 0.178         | 1             | 5.62             | 1.65E-01 | 1      | 1     |
| Thyroid Hormone Synthesis                   | 13                 | 0.178         | 1             | 5.62             | 1.65E-01 | 1      | 1     |
| Glycine and Serine Metabolism               | 59                 | 0.807         | 2             | 2.48             | 1.91E-01 | 1      | 1     |
| Catecholamine Biosynthesis                  | 20                 | 0.273         | 1             | 3.66             | 2.43E-01 | 1      | 1     |
| Tyrosine Metabolism                         | 72                 | 0.984         | 2             | 2.03             | 2.58E-01 | 1      | 1     |
| Purine Metabolism                           | 74                 | 1.010         | 2             | 1.98             | 2.68E-01 | 1      | 1     |
| Cysteine Metabolism                         | 26                 | 0.355         | 1             | 2.82             | 3.04E-01 | 1      | 1     |
| Folate Metabolism                           | 29                 | 0.396         | 1             | 2.53             | 3.33E-01 | 1      | 1     |
| Urea Cycle                                  | 29                 | 0.396         | 1             | 2.53             | 3.33E-01 | 1      | 1     |
| Amino Sugar Metabolism                      | 33                 | 0.451         | 1             | 2.22             | 3.70E-01 | 1      | 1     |
| Beta-Alanine Metabolism                     | 34                 | 0.465         | 1             | 2.15             | 3.79E-01 | 1      | 1     |
| Aspartate Metabolism                        | 35                 | 0.479         | 1             | 2.09             | 3.87E-01 | 1      | 1     |
| Nicotinate and Nicotinamide Metabolism      | 37                 | 0.506         | 1             | 1.98             | 4.05E-01 | 1      | 1     |
| Porphyrin Metabolism                        | 40                 | 0.547         | 1             | 1.83             | 4.30E-01 | 1      | 1     |
| Methionine Metabolism                       | 43                 | 0.588         | 1             | 1.70             | 4.54E-01 | 1      | 1     |
| Histidine Metabolism                        | 43                 | 0.588         | 1             | 1.70             | 4.54E-01 | 1      | 1     |
| Warburg Effect                              | 58                 | 0.793         | 1             | 1.26             | 5.60E-01 | 1      | 1     |
| Tryptophan Metabolism                       | 60                 | 0.820         | 1             | 1.22             | 5.73E-01 | 1      | 1     |

|                                |    |       |   |      |          |   |   |
|--------------------------------|----|-------|---|------|----------|---|---|
| Bile Acid Biosynthesis         | 65 | 0.889 | 1 | 1.12 | 6.03E-01 | 1 | 1 |
| Arachidonic Acid<br>Metabolism | 69 | 0.943 | 1 | 1.06 | 6.26E-01 | 1 | 1 |

---

<sup>†</sup> The number of metabolites in a metabolite set.

**Table S3.** Summary of the performance metrics from 100 repeated runs of the diagnostic model using four machine learning methods.

|                    | NAFLD-specific metabolic features |                     |                     |                     | Clinical and genetic variables |                     |                     |                     |
|--------------------|-----------------------------------|---------------------|---------------------|---------------------|--------------------------------|---------------------|---------------------|---------------------|
|                    | Logistic regression               | ElasticNet          | Random forest       | XGBoost             | Logistic regression            | ElasticNet          | Random forest       | XGBoost             |
| <b>AUROC</b>       | 0.94<br>(0.76-1.00)               | 0.95<br>(0.85-1.00) | 0.95<br>(0.80-1.00) | 0.94<br>(0.78-1.00) | 0.95<br>(0.80-1.00)            | 0.95<br>(0.86-1.00) | 0.96<br>(0.88-1.00) | 0.95<br>(0.84-1.00) |
| <b>Accuracy</b>    | 0.88<br>(0.69-0.97)               | 0.88<br>(0.75-1.00) | 0.88<br>(0.72-0.97) | 0.84<br>(0.72-0.94) | 0.88<br>(0.72-0.97)            | 0.88<br>(0.81-1.00) | 0.88<br>(0.75-1.00) | 0.88<br>(0.75-0.97) |
| <b>Sensitivity</b> | 0.83<br>(0.50-1.00)               | 0.75<br>(0.58-1.00) | 0.83<br>(0.50-1.00) | 0.75<br>(0.42-1.00) | 0.83<br>(0.58-1.00)            | 0.83<br>(0.50-1.00) | 0.83<br>(0.50-1.00) | 0.83<br>(0.50-1.00) |
| <b>Specificity</b> | 0.90<br>(0.70-1.00)               | 0.95<br>(0.75-1.00) | 0.90<br>(0.65-1.00) | 0.90<br>(0.70-1.00) | 0.90<br>(0.70-1.00)            | 0.95<br>(0.75-1.00) | 0.90<br>(0.75-1.00) | 0.90<br>(0.75-1.00) |
| <b>F1 score</b>    | 0.81<br>(0.55-0.96)               | 0.82<br>(0.67-1.00) | 0.82<br>(0.63-0.96) | 0.78<br>(0.53-0.92) | 0.86<br>(0.67-0.96)            | 0.86<br>(0.67-1.00) | 0.84<br>(0.63-1.00) | 0.82<br>(0.60-0.96) |

Values are given as median (minimum-maximum).



**Table S4.** Multiple logistic regression model using NAFLD-specific metabolic features and clinical and genetic variables.

| Variables                                | Coefficient | SE    | z-value | p-value  |
|------------------------------------------|-------------|-------|---------|----------|
| <b>NAFLD-specific metabolic features</b> |             |       |         |          |
| (Intercept)                              | 4.395       | 1.180 | 3.725   | 0.0002   |
| Val                                      | 5.131       | 2.252 | 2.278   | 0.0227   |
| Ile                                      | -3.652      | 2.460 | -1.485  | 0.1376   |
| Lys                                      | 3.081       | 2.065 | 1.492   | 0.1356   |
| Tyr                                      | 7.123       | 2.104 | 3.385   | 0.0007   |
| Glu                                      | 28.869      | 9.109 | 3.169   | 0.0015   |
| Gly                                      | -4.840      | 1.896 | -2.552  | 0.0107   |
| TG (52:7)                                | -2.081      | 1.248 | -1.668  | 0.0954   |
| PC-O (30:0)                              | -2.910      | 1.527 | -1.906  | 0.0566   |
| SM (38:3)                                | 5.852       | 2.637 | 2.220   | 0.0264   |
| <b>Clinical and genetic variables</b>    |             |       |         |          |
| (Intercept)                              | 3.374       | 0.975 | 3.460   | 0.0005   |
| BMI z-score                              | 7.379       | 1.833 | 4.027   | < 0.0001 |
| Sex (female)                             | -2.433      | 0.951 | -2.560  | 0.0105   |
| ALT                                      | 15.717      | 4.413 | 3.561   | 0.0004   |
| PNPLA3 rs738409                          | 2.585       | 1.105 | 2.339   | 0.0193   |

**Table S5.** Variable importance of three diagnostic models using NAFLD-specific metabolic features.

| ElasticNet (glmnet) |        | Random forest (ranger) |        | XGBoost (xgbTree) |        |
|---------------------|--------|------------------------|--------|-------------------|--------|
| Metabolite          | Score  | Metabolite             | Score  | Metabolite        | Score  |
| Tyr                 | 100    | SM(38:3)               | 100    | Tyr               | 100    |
| SM(38:3)            | 85.872 | Tyr                    | 85.905 | SM(38:3)          | 71.746 |
| Glu                 | 78.406 | xLeu                   | 73.956 | Gly               | 53.489 |
| Gly                 | 73.254 | Val                    | 73.506 | Glu               | 44.524 |
| PC:O(30:0)          | 63.572 | SM(36:0)               | 63.616 | Val               | 26.3   |
| Val                 | 54.924 | Gly                    | 48.47  | PC:O(30:0)        | 21.545 |
| AC(5:0)             | 53.196 | Ile                    | 43.735 | xLeu              | 21.016 |
| LPC(18:2)           | 52.006 | LPC(18:2)              | 40.95  | TG(52:7)          | 20.137 |
| TG(50:1)            | 41.624 | TG(50:1)               | 37.987 | PC(46:2)          | 18.839 |
| SM(36:0)            | 35.029 | Glu                    | 32.414 | Lys               | 16.355 |
| PC(46:2)            | 34.573 | PC(46:2)               | 28.593 | LPC(18:2)         | 13.294 |
| PC(44:1)            | 34.356 | PC:O(30:0)             | 23.944 | SM(36:0)          | 10.795 |
| DG(34:1)            | 31.008 | DG(34:1)               | 23.745 | TG(50:1)          | 7.421  |
| Ile                 | 30.839 | TG(54:3)               | 16.24  | Ile               | 6.543  |
| xLeu                | 23.012 | PC(44:1)               | 15.903 | PC(44:1)          | 4.163  |
| TG(52:7)            | 15.234 | AC(5:0)                | 10.108 | DG(34:1)          | 1.194  |
| TG(54:3)            | 7.187  | Lys                    | 6.875  | TG(54:3)          | 1.164  |
| Lys                 | 0      | TG(52:7)               | 0      | AC(5:0)           | 0      |

**Table S6.** Genotype frequencies of seven genetic variants of the study population.

| Gene          | rs number              | Transition        | Genotype frequencies by the number of risk alleles of each group |       |       |       |       |       | p-value             |                     |
|---------------|------------------------|-------------------|------------------------------------------------------------------|-------|-------|-------|-------|-------|---------------------|---------------------|
|               |                        |                   | Control                                                          |       |       | NAFLD |       |       | Cochran–Armitage    | Chi-squared         |
|               |                        |                   | 0                                                                | 1     | 2     | 0     | 1     | 2     |                     |                     |
| <i>PNPLA3</i> | rs738409 <sup>†</sup>  | C>G <sup>‡</sup>  | 0.311                                                            | 0.475 | 0.213 | 0.212 | 0.298 | 0.490 | 0.0029 <sup>§</sup> | 0.0019 <sup>§</sup> |
| <i>GCKR</i>   | rs780094               | T <sup>‡</sup> >C | 0.246                                                            | 0.492 | 0.262 | 0.183 | 0.442 | 0.375 | 0.1315              | 0.2989              |
| <i>APOC3</i>  | rs2070666              | T>A <sup>‡</sup>  | 0.508                                                            | 0.410 | 0.082 | 0.462 | 0.433 | 0.106 | 0.5052              | 0.7998              |
| <i>SAMM50</i> | rs2073080 <sup>†</sup> | C>T <sup>‡</sup>  | 0.311                                                            | 0.508 | 0.180 | 0.173 | 0.394 | 0.433 | 0.0011 <sup>§</sup> | 0.0030 <sup>§</sup> |
| <i>SAMM50</i> | rs3761472 <sup>†</sup> | A>G <sup>‡</sup>  | 0.311                                                            | 0.541 | 0.148 | 0.183 | 0.375 | 0.442 | 0.0004 <sup>§</sup> | 0.0005 <sup>§</sup> |
| <i>TM6SF2</i> | rs58542926             | C>T <sup>‡</sup>  | 0.803                                                            | 0.197 | 0     | 0.769 | 0.231 | 0     | 0.6092              | NA                  |
| <i>MBOAT7</i> | rs641738               | C>T <sup>‡</sup>  | 0.557                                                            | 0.410 | 0.033 | 0.587 | 0.365 | 0.048 | 0.8816              | 0.7915              |

Allele frequencies and genotype frequencies were calculated according to the number of risk alleles of each genetic variant. An association between the presence of NAFLD and the number of risk alleles of each genetic variant was evaluated by the Cochran–Armitage test for trend and Chi-squared test with R version 4.1.0 (R Foundation for Statistical Computing, Vienna, Austria).

<sup>†</sup> These genetic variants showed linkage disequilibrium.

<sup>‡</sup> Risk allele of the genetic variant.

<sup>§</sup> Significant by Cochran–Armitage test or Chi-squared test ( $p < 0.05$ ).

**Figure S1.** Differences in metabolic profiles of subgroups of the study population.

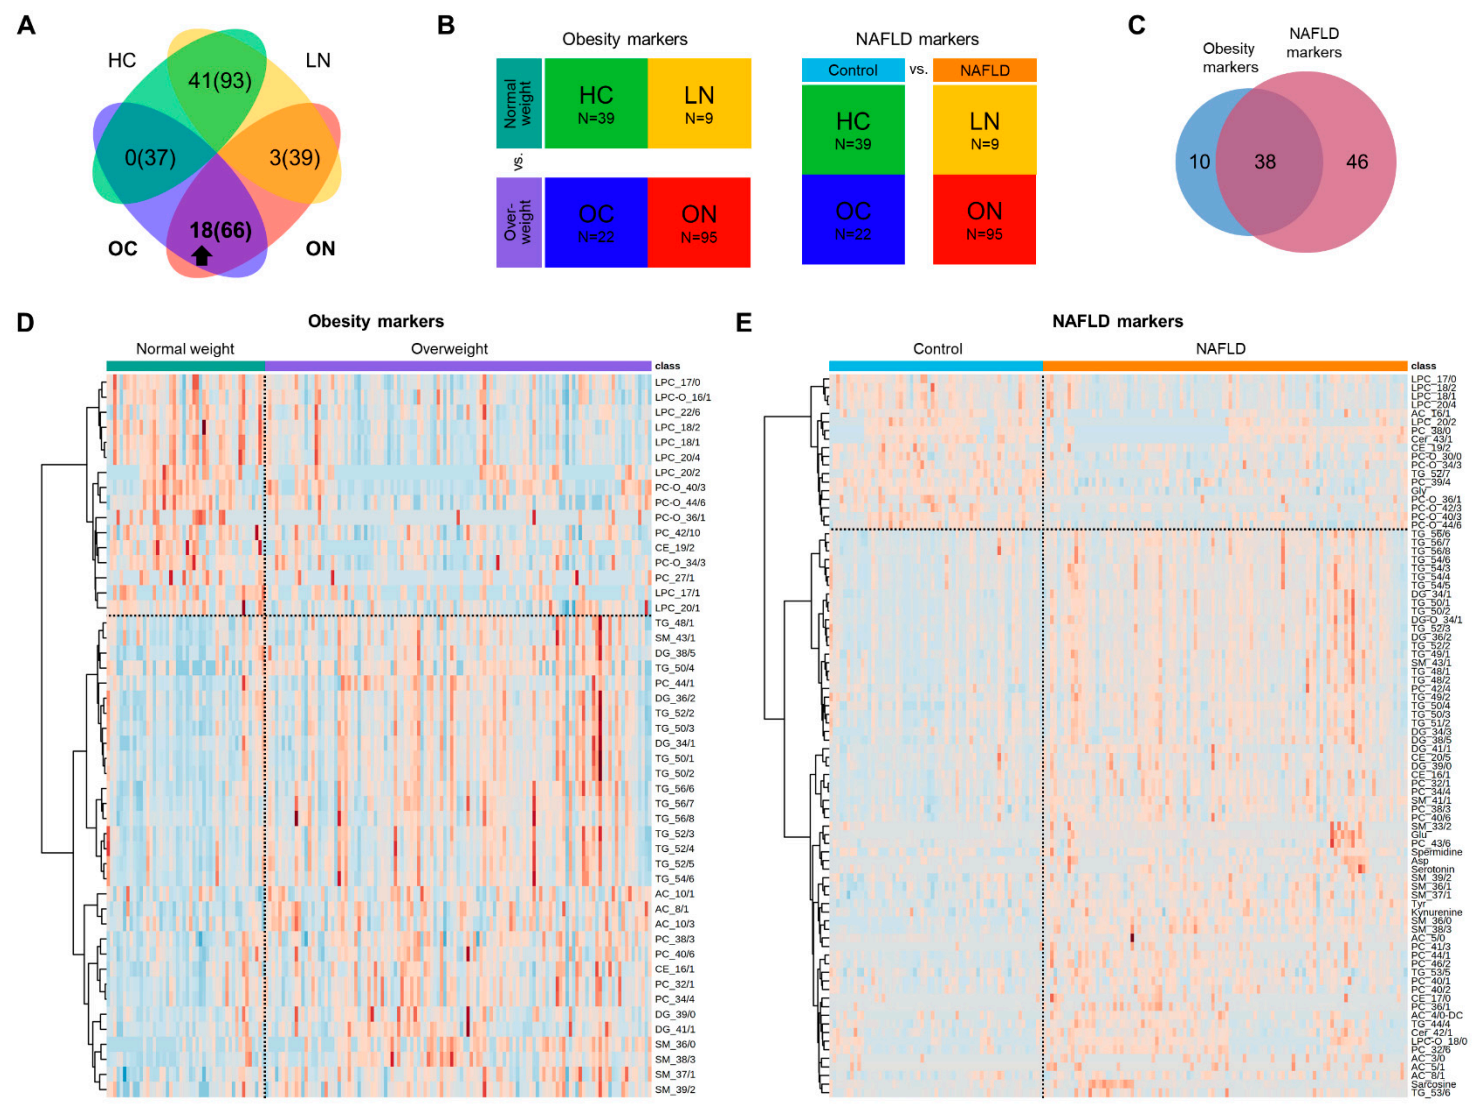

Comments on Figure S1: Figure S1A shows the number of significant metabolites (FDR-adjusted p-value < 0.05, fold change > 1.1) between HC and LN, HC and OC, LN and ON, or OC and ON by Wilcoxon's rank-sum test; the findings implied that more metabolites were changed by NAFLD than by obesity (none of the metabolites were even significantly changed in HC vs. OC). We also compared the metabolic profiles of subgroups, control versus NAFLD group, or normal-weight versus overweight group (Figure S1B). A greater number of significant metabolites (FDR-adjusted p-value < 0.05, fold change > 1.2) were observed in the comparison between the control and NAFLD groups (84 metabolites) than in the comparison between the normal-weight and overweight groups (48 metabolites), as illustrated in a Venn diagram (Figure S1C). In addition, most of the plasma triglyceride, diglyceride, and phosphatidylcholine levels were significantly elevated in the overweight group, irrespective of NAFLD presence, but they were also simultaneously selected as NAFLD markers (Figures S1D and S1E) which may act as concomitant variables. Considering these findings, we focused on a subpopulation with BMI z-scores > 1 (OC and ON groups) to identify promising candidates (Figure S1A, black arrow), then verified these in the normal-weight group.

**Figure S2.** Clinical characteristics of the study population according to the occurrence of obesity and NAFLD. Abbreviations: NAFLD, nonalcoholic fatty liver disease; BMI, body mass index; AST, aspartate aminotransferase; ALT, alanine aminotransferase; GGT, gamma-glutamyltransferase; ALP, alkaline phosphatase; HbA1c, Hemoglobin A1c; and HOMA-IR, homeostatic model assessment for insulin resistance.

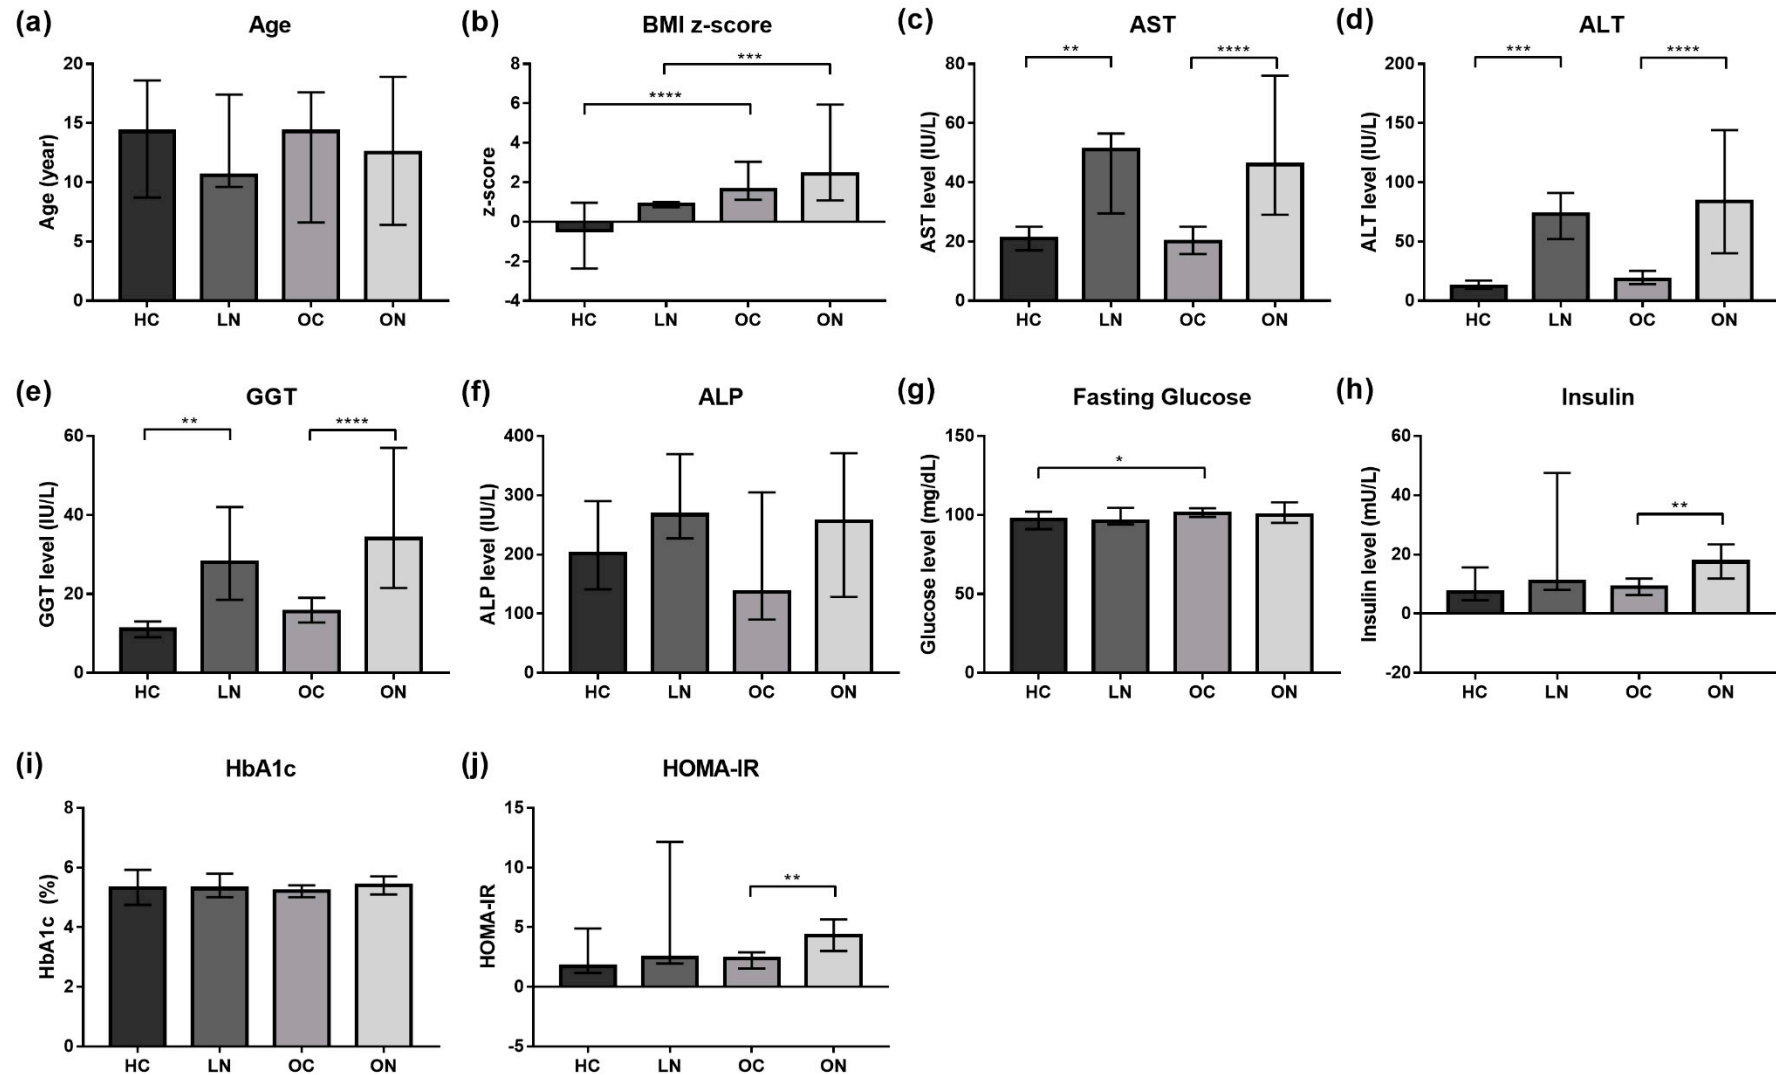

(a)-(b) Median bar charts with error bars indicating the range.

(c)-(j) Median bar charts with error bars indicating the interquartile range.  
Significance by post-hoc Dunn's multiple comparison test following Kruskal–Wallis test.  
P-values: < 0.0332(\*), < 0.0021 (\*\*), < 0.0002 (\*\*\*), < 0.0001 (\*\*\*\*).



**Figure S3.** Pareto-scaled score plot of principal component analysis showing metabolomic distribution in the study population (HC, LN, OC, and ON).

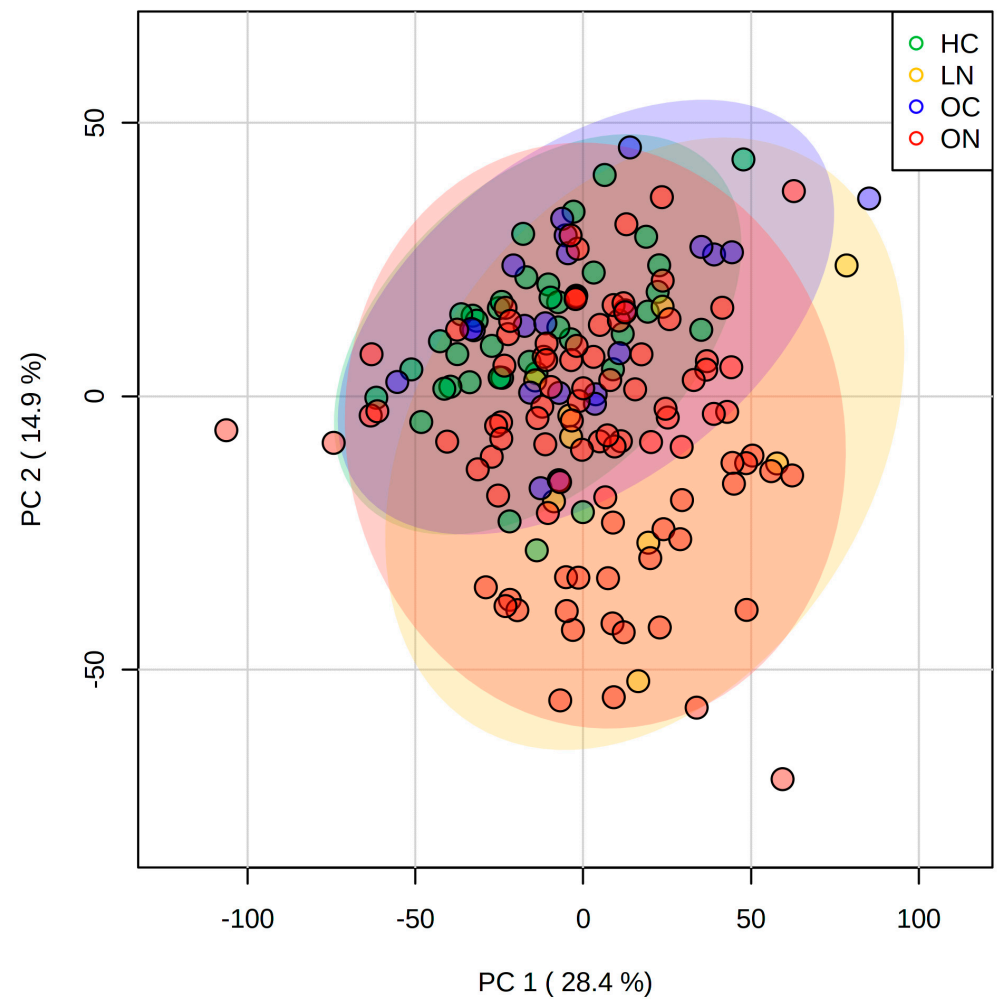

**Figure S4.** Spearman correlations between NAFLD-specific metabolic features and insulin resistance with  $p < 0.05$ , except Tyr, Lys, Gly, LPC (18:2), and PC-O (30:0). Abbreviations: Glu, glutamic acid; TG, triglyceride; DG, diglyceride; xLeu, sum of leucine and isoleucine levels; PC, phosphatidylcholine; SM, sphingomyelin; Ile, isoleucine; Val, valine; AC, acylcarnitine; Tyr, tyrosine; Lys, lysine; Gly, glycine; LPC, lysophosphatidylcholine; and PC-O, ether-linked phosphatidylcholine.

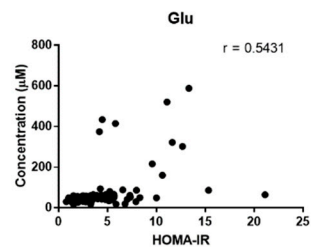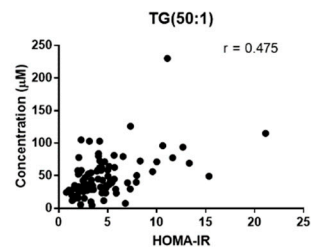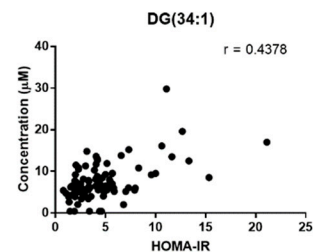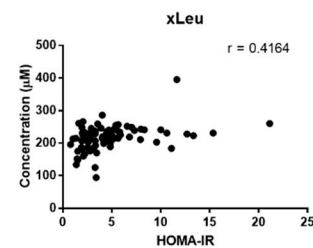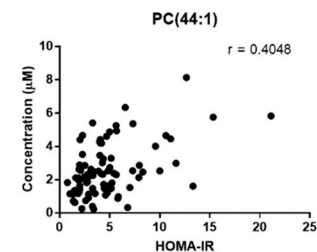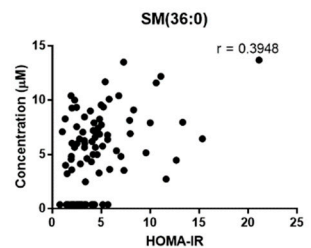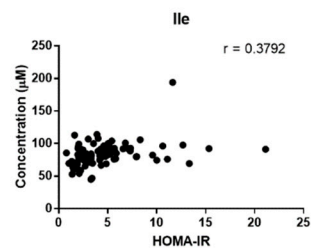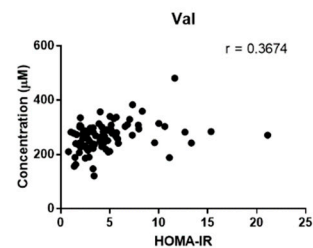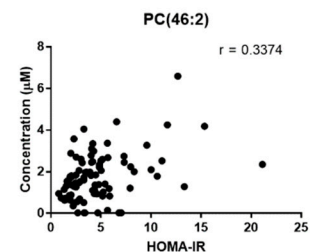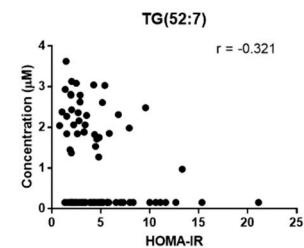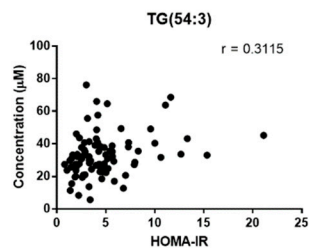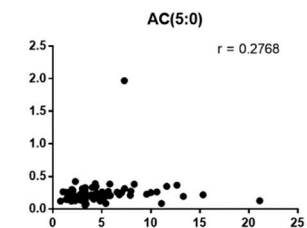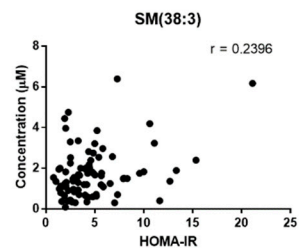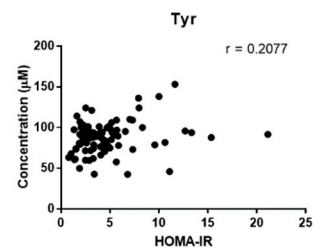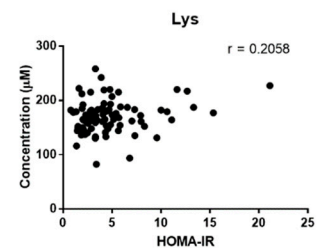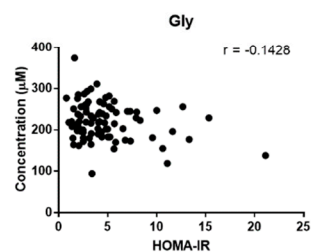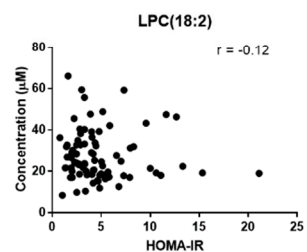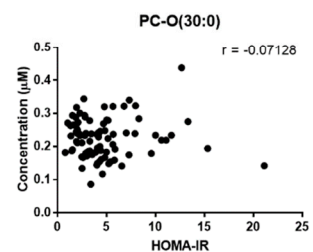

Supplement: s1 [file s1]
